# Supplementary material for: Effect of IL-7 on Th17 cell responses in a mouse model of neutrophilic asthma
Source: PubMed Central journal article supplement — Mol Med Rep. 2020 May 27;22(2):1205–12. doi: 10.3892/mmr.2020.11191 (PMC7339814; doi:10.3892/mmr.2020.11191), 2020-05-27

Figure S1. Expressions of Ki-67 and caspase-3 protein of Th17 cells in NC mice are not affected by IL-7. (A) No significant difference was observed in Ki-67 expression between the NC and NC + IL-7 groups. (B) Caspase-3 expression demonstrated no difference in the NC and NC + IL-7 groups. NC, normal control; IL-7, interleukin-7.

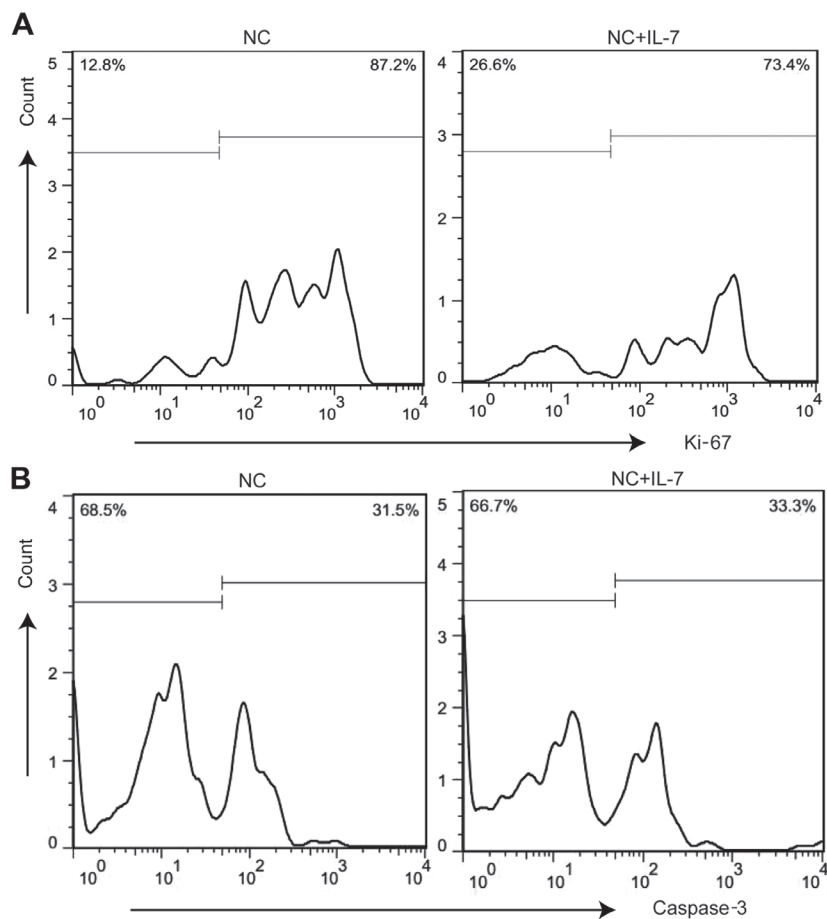

Supplement: Supplementary_Data.pdf [file Supplementary_Data.pdf]
